# Supplementary material for: Atomic-scale environment of niobium in ore minerals as revealed by XANES and EXAFS at the Nb K-edge
Source: Copernicus journal article supplement (doi:10.5194/ejm-36-55-2024), 2024-01-08
Supplement: Supplementary file 1 [file ejm-36-55-2024-supplement.pdf]

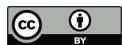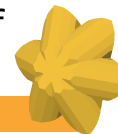

*Supplement of*

**Atomic-scale environment of niobium in ore minerals as revealed by XANES and EXAFS at the Nb K-edge**

**Quentin Bollaert et al.**

*Correspondence to:* Quentin Bollaert (qbollaert@me.com)

The copyright of individual parts of the supplement might differ from the article licence.

# 1) Crystallographic and chemical analysis of Nb minerals

**Table S1.** Representative chemical composition of the pyrochlore samples

| Representative compositions of pyrochlore |                       |                 |                        |                                        |
|-------------------------------------------|-----------------------|-----------------|------------------------|----------------------------------------|
| wt%                                       | Fluorcalciopyrochlore | Hydropyrochlore | Ba-rich kenopyrochlore | U-rich oxynatropyrochlore              |
| F                                         | 7.407                 | 0.181           | 0.094                  | 1.5                                    |
| Na <sub>2</sub> O                         | 8.324                 | 0.055           | 0.046                  | 2.14                                   |
| MgO                                       | 0.041                 | 0.005           | 0.057                  | -                                      |
| Al <sub>2</sub> O <sub>3</sub>            | 0.028                 | 1.260           | 0.648                  | 0.07                                   |
| SiO <sub>2</sub>                          | 0.077                 | 0.919           | 1.349                  | -                                      |
| K <sub>2</sub> O                          | 0.004                 | 0.212           | 0.038                  | 0.05                                   |
| CaO                                       | 13.971                | 0.268           | 0.198                  | 12.3                                   |
| TiO <sub>2</sub>                          | 0.957                 | 4.162           | 1.236                  | 12.3                                   |
| MnO                                       | -                     | 0.011           | 0.152                  | 0.32                                   |
| FeO                                       | 0.030                 | 0.362           | 7.978                  | 1.91                                   |
| SrO                                       | 1.695                 | 2.865           | 0.113                  | 0.17                                   |
| Y <sub>2</sub> O <sub>3</sub>             | -                     | -               | 0.016                  | 0.32                                   |
| ZrO <sub>2</sub>                          | -                     | 0.008           | 2.571                  | -                                      |
| Nb <sub>2</sub> O <sub>5</sub>            | 68.824                | 76.409          | 64.497                 | 34.5                                   |
| BaO                                       | -                     | -               | 8.043                  | 0.17                                   |
| Ta <sub>2</sub> O <sub>5</sub>            | 0.146                 | 0.063           | 0.159                  | 9.5                                    |
| PbO                                       | -                     | -               | 0.00                   | 1.76                                   |
| La <sub>2</sub> O <sub>3</sub>            | 0.163                 | 0.040           | 0.026                  |                                        |
| CeO <sub>2</sub>                          | 0.443                 | 0.069           | 1.246                  | 0.49 (Ln <sub>2</sub> O <sub>3</sub> ) |
| Nd <sub>2</sub> O <sub>3</sub>            | -                     | -               | 0.00                   |                                        |
| ThO <sub>2</sub>                          | 0.237                 | 0.085           | 3.067                  | 1.13                                   |
| UO <sub>2</sub>                           | -                     | 0.025           | 0.197                  | 19.7                                   |
| Total                                     | 102.207               | 87.000          | 91.732                 | 97.85                                  |
| O=F                                       | 3.119                 | 0.076           | 0.038                  | 0.53                                   |
| Total                                     | 99.008                | 86.924          | 91.694                 | 97.32                                  |

**Table S2.** Representative chemical composition of the other natural samples studied.

| Representative compositions of Nb minerals |                |               |           |          |           |                 |                |
|--------------------------------------------|----------------|---------------|-----------|----------|-----------|-----------------|----------------|
| wt%                                        | Columbite-(Mn) | Nb perovskite | Niocalite | Lueshite | Wöhlerite | Fergusonite-(Y) | Aeschynite-(Y) |
| F                                          | 0.013          | 0.019         | 3.291     | -        | 5.394     | -               | -              |
| Na <sub>2</sub> O                          | 0.017          | 1.499         | 0.788     | 17.701   | 8.796     | -               | -              |
| MgO                                        | 0.006          | 0.250         | 0.334     | 0.015    | 0.169     | -               | -              |
| Al <sub>2</sub> O <sub>3</sub>             | -              | 0.208         | 0.112     | 0.001    | 0.015     | -               | -              |
| SiO <sub>2</sub>                           | -              | -             | 29.076    | 0.009    | 29.841    | -               | -              |
| P <sub>2</sub> O <sub>5</sub>              | -              | -             | -         | -        | -         | 0.275           | 0.189          |
| K <sub>2</sub> O                           | -              | -             | -         | 0.009    | 0.015     | -               | -              |
| CaO                                        | 0.011          | 33.485        | 43.692    | 1.061    | 25.609    | 1.567           | 2.144          |
| TiO <sub>2</sub>                           | 0.719          | 36.799        | 0.120     | 2.552    | 1.256     | 1.273           | 30.242         |
| MnO                                        | 12.011         | 0.052         | 0.806     | 0.005    | 0.965     | -               | -              |
| FeO                                        | 7.804          | 4.696         | 0.260     | 0.093    | 1.273     | -               | 0.713          |
| SrO                                        | -              | 0.232         | 0.246     | 0.054    | 0.000     | -               | -              |
| Y <sub>2</sub> O <sub>3</sub>              | -              | -             | 0.051     | -        | 0.401     | 24.364          | 15.792         |
| ZrO <sub>2</sub>                           | -              | 0.974         | 0.404     | 0.012    | 13.233    | -               | -              |
| Nb <sub>2</sub> O <sub>5</sub>             | 69.201         | 16.392        | 15.368    | 74.644   | 12.034    | 46.842          | 14.218         |
| BaO                                        | -              | -             | -         | -        | 0.000     | -               | -              |
| Ta <sub>2</sub> O <sub>5</sub>             | 7.179          | 0.728         | 0.848     | 0.528    | 0.212     | 1.273           | 3.481          |
| PbO                                        | -              | -             | -         | -        | 0.000     | -               | -              |
| La <sub>2</sub> O <sub>3</sub>             | -              | 0.765         | 0.180     | 0.456    | 0.047     | 0.029           | -              |
| Ce <sub>2</sub> O <sub>3</sub>             | -              | 2.343         | 0.639     | 1.144    | 0.200     | 0.402           | 0.781          |
| Pr <sub>2</sub> O <sub>3</sub>             | -              | -             | -         | -        | -         | 0.128           | 0.173          |
| Nd <sub>2</sub> O <sub>3</sub>             | -              | 0.124         | 0.035     | 0.036    | 0.012     | 0.814           | 1.573          |
| Sm <sub>2</sub> O <sub>3</sub>             | -              | -             | -         | -        | -         | 0.511           | 1.691          |
| Eu <sub>2</sub> O <sub>3</sub>             | -              | -             | -         | -        | -         | 0.109           | 0.561          |
| Gd <sub>2</sub> O <sub>3</sub>             | -              | -             | -         | -        | -         | 1.117           | 3.365          |
| Tb <sub>2</sub> O <sub>3</sub>             | -              | -             | -         | -        | -         | 0.148           | 0.457          |
| Dy <sub>2</sub> O <sub>3</sub>             | -              | -             | -         | -        | -         | 1.232           | 3.547          |
| Ho <sub>2</sub> O <sub>3</sub>             | -              | -             | -         | -        | -         | 0.509           | 0.878          |
| Er <sub>2</sub> O <sub>3</sub>             | -              | -             | -         | -        | -         | 2.165           | 2.681          |
| Tm <sub>2</sub> O <sub>3</sub>             | -              | -             | -         | -        | -         | 3.624           | 2.513          |
| Yb <sub>2</sub> O <sub>3</sub>             | -              | -             | -         | -        | -         | -               | -              |
| Lu <sub>2</sub> O <sub>3</sub>             | -              | -             | -         | -        | -         | 0.603           | 0.408          |
| ThO <sub>2</sub>                           | -              | -             | -         | 0.906    | 0.000     | 7.562           | 7.388          |
| UO <sub>2</sub>                            | -              | -             | -         | -        | 0.000     | 4.888           | 3.412          |
| Total                                      | 97.057         | 98.570        | 96.249    | 99.251   | 99.470    | 99.435          | 96.221         |
| O=F                                        | 0.005          | 0.008         | 1.386     |          | 2,27      |                 |                |
| Total                                      | 97.052         | 98.562        | 94.863    | 99.251   | 97.200    | 99.435          | 96.221         |

**Table S3.** Representative chemical composition of the other natural samples studied.

| Nb mineral reference      | Crystal system | Space group | Z | a (Å)       | b (Å)       | c (Å)       | $\alpha$ (°) | $\beta$ (°) | $\gamma$ (°) | V (Å <sup>3</sup> ) | Reflection indexed | $\Theta$ (°)   |
|---------------------------|----------------|-------------|---|-------------|-------------|-------------|--------------|-------------|--------------|---------------------|--------------------|----------------|
| Columbite-(Mn)            | Orthorhombic   | Pbcn        | 4 | 14.244(2)   | 5.7361(14)  | 5.1216(10)  | 90.0         | 90.0        | 90.0         | 418.40(12)          | 402                | 3.8180–28.4390 |
| Lueshite                  | Cubic          | Pn-3m       | 8 | 7.8103(5)   | 7.8103(5)   | 7.8103(5)   | 90.0         | 90.0        | 90.0         | 476.43(6)           | 214                | 5.2270–27.6040 |
| Nb perovskite             | Tetragonal     | Pbnm        | 4 | 5.429(4)    | 5.4860(3)   | 7.718(4)    | 90.0         | 90.0        | 90.0         | 229.8(2)            | 294                | 5.2810–28.5230 |
| Niocalite                 | Monoclinic     | P1c1        | 2 | 10.8741(15) | 10.4515(8)  | 7.3997(13)  | 90.0         | 109.89(2)   | 90.0         | 790.78(19)          | 942                | 3.5880–28.8090 |
| Wöhlerite                 | Monoclinic     | P1211       | 4 | 10.8227(9)  | 10.2312(5)  | 7.2901(5)   | 90.0         | 109.156(9)  | 90.0         | 762.52(3)           |                    |                |
| <i>Pyrochlore samples</i> |                |             |   |             |             |             |              |             |              |                     |                    |                |
| Fluorcalciopyrochlore     | Cubic          | Fd-3m       | 8 | 10.450(3)   | 10.450(3)   | 10.450(3)   | 90.0         | 90.0        | 90.0         | 1141.2(5)           | 111                | 6.3470–25.4270 |
| Ba-rich kenopyrochlore    | Cubic          | Fd-3m       | 8 | 10.5852(9)  | 10.5852(9)  | 10.5852(9)  | 90.0         | 90.0        | 90.0         | 1186.04(17)         | 128                | 6.3470–26.6960 |
| Hydropyrochlore           | Cubic          | Fd-3m       | 8 | 10.6054(14) | 10.6054(14) | 10.6054(14) | 90.0         | 90.0        | 90.0         | 1192.8(3)           | 229                | 6.3600–26.3740 |

### 3) XRD pattern of synthetic Nb-substituted oxides

The diffraction patterns of Nb-substituted anatase reveal variations in the Bragg reflections, as depicted in Fig. S1b and c. Specifically, in the diffraction pattern of anatase containing 5 wt% Nb, only reflections (103) and (112) are prominent. Additionally, the reflections (211), (116), and (220) appear less pronounced in the diffraction pattern of anatase with 1 wt% Nb. The variations in the width of the reflections can be attributed to disparities in crystallinity. Using the Scherrer equation with the (101) reflection, we determined that the nanocrystal sizes are 92 nm, 108 nm, and 107 nm for anatase samples containing 1 wt% Nb, 5 wt% Nb, and 10 wt% Nb, respectively.

Moreover, there are discernible shifts in  $2\theta$  between these diffraction patterns (Fig. S1c). As shown for the (101) reflection, the diffraction peak of Nb-doped anatase with 1 wt % Nb and 5 wt% Nb are aligned at  $29.5^\circ$  while that of 10 wt% Nb is located at  $29.3^\circ$ . This shift involves modifications in the unit-cell parameters due to the incorporation of Nb<sup>5+</sup> in the crystal lattice of anatase. Rietveld refinement of the diffraction patterns reveals that the unit-cell parameters of Nb-doped anatase are larger than pure anatase ( $a = b = 3.78 \text{ \AA}$ ,  $c = 9.51 \text{ \AA}$ ). More specifically, an increase in the  $c$  parameter with Nb doping, resulting in  $c$  values of  $9.51 \text{ \AA}$ ,  $9.55 \text{ \AA}$ , and  $9.58 \text{ \AA}$  for

Nb-anatase with 1 wt%, 5 wt%, and 10 wt% Nb, respectively. Conversely, the impact of Nb doping on the  $a$  parameter is less straightforward. It is slightly larger in anatase with 1 wt% Nb than in the case of 5 wt% Nb. However, the  $a$  parameter reaches its maximum value in anatase with 10 wt% Nb ( $a = 3.85 \text{ \AA}$ ).

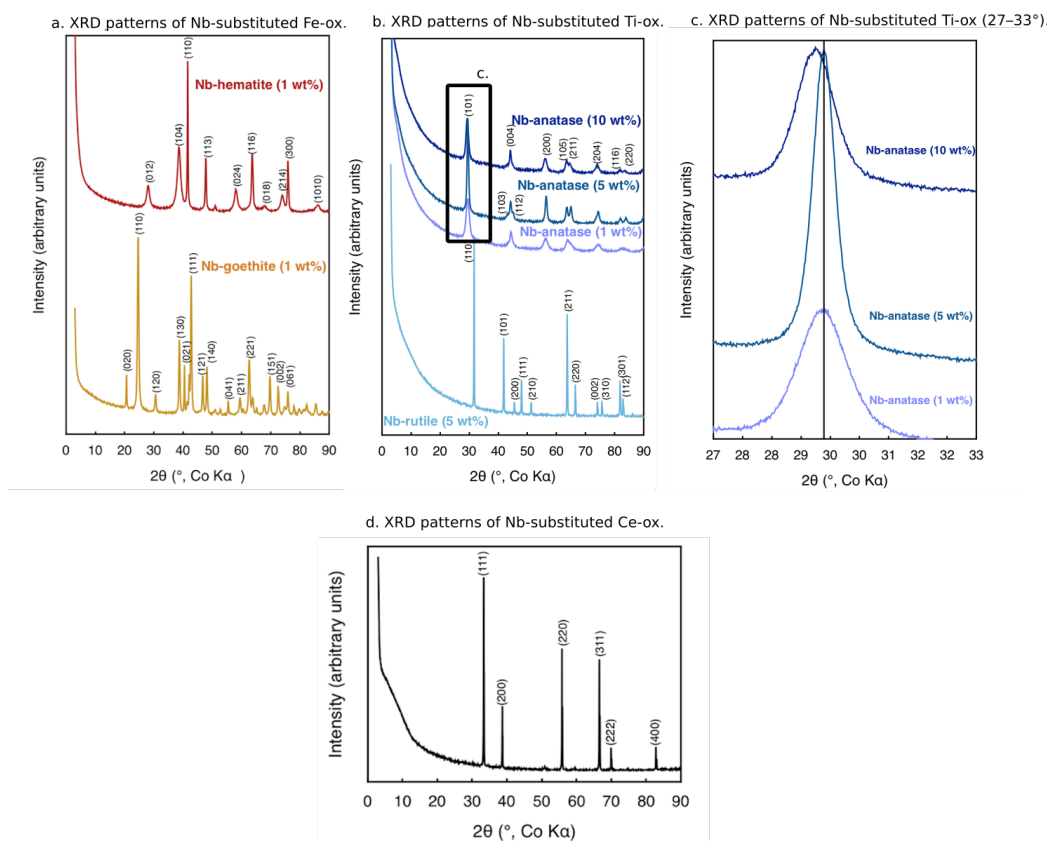

**Figure S1.** XRD patterns of (a) Nb-substituted hematite and goethite; (b) Nb-substituted rutile and anatase; (c) Close-up on the (101) peak. (d) Nb-substituted cerianite.

#### 4) Refinement details of hydropyrochlore sample

**Table S4.** Crystallographic data and structure refinement of hydropyrochlore sample.

|                                             |                                                                          |
|---------------------------------------------|--------------------------------------------------------------------------|
| Empirical formula                           | Nb <sub>1.9</sub> O <sub>8.75</sub> Sr <sub>0.07</sub> Ti <sub>0.1</sub> |
| Formula weight                              | 327.45                                                                   |
| Temperature/K                               | 293                                                                      |
| Crystal system                              | cubic                                                                    |
| Space group                                 | Fd-3m                                                                    |
| a/Å                                         | 10.5690(10)                                                              |
| b/Å                                         | 10.5690(10)                                                              |
| c/Å                                         | 10.5690(10)                                                              |
| $\alpha$ /°                                 | 90                                                                       |
| $\beta$ /°                                  | 90                                                                       |
| $\gamma$ /°                                 | 90                                                                       |
| Volume/Å <sup>3</sup>                       | 1180.6(3)                                                                |
| Z                                           | 8                                                                        |
| $\rho_{\text{calc}}/\text{cm}^3$            | 3.685                                                                    |
| $\mu/\text{mm}^1$                           | 4.460                                                                    |
| F(000)                                      | 1222.0                                                                   |
| Crystal size/mm <sup>3</sup>                | 0.1 × 0.1 × 0.05                                                         |
| Radiation                                   | Mo K $\alpha$ ( $\lambda = 0.71073$ )                                    |
| 2 $\theta$ range for data collection/°      | 6.678 to 56.162                                                          |
| Index ranges                                | -8 ≤ h ≤ 14, -12 ≤ k ≤ 14, -9 ≤ l ≤ 11                                   |
| Reflections collected                       | 615                                                                      |
| Independent reflections                     | 89 [R <sub>int</sub> = 0.0342, R <sub>sigma</sub> = 0.0164]              |
| Data/restraints/parameters                  | 89/0/10                                                                  |
| Goodness-of-fit on F <sup>2</sup>           | 1.309                                                                    |
| Final R indexes [I ≥ 2 $\sigma$ (I)]        | R <sub>1</sub> = 0.0395, wR <sub>2</sub> = 0.0831                        |
| Final R indexes [all data]                  | R <sub>1</sub> = 0.0452, wR <sub>2</sub> = 0.0881                        |
| Largest diff. peak/hole / e Å <sup>-3</sup> | 0.38/-1.34                                                               |

**Table S5.** Fractional atomic coordinates ( $\times 10^4$ ) and equivalent isotropic displacement parameters ( $\text{\AA}^2 \times 10^3$ ).  $U_{\text{eq}}$  is defined as 1/3 of the trace of the orthogonalized  $U_{ij}$  tensor.

| Atom | x    | y       | z    | U(eq)    |
|------|------|---------|------|----------|
| Nb   | 2500 | 5000    | 7500 | 40.8(6)  |
| Ti   | 2500 | 5000    | 7500 | 40.8(6)  |
| O3   | 3750 | 5623(5) | 8750 | 30.9(10) |
| O2   | 5000 | 7500    | 7500 | 37(2)    |
| O1   | 6250 | 6250    | 6250 | 199(16)  |
| Sr   | 6250 | 6250    | 6250 | 199(16)  |

**Table S6.** Anisotropic displacement parameters ( $\text{\AA}^2 \times 10^3$ ). The anisotropic displacement factor exponent takes the form:  $-2\pi^2[h^2a^*U_{11}+2hka^*b^*U_{12}+\dots]$ .

| Atom | $U_{11}$ | $U_{22}$ | $U_{33}$ | $U_{23}$ | $U_{13}$ | $U_{12}$ |
|------|----------|----------|----------|----------|----------|----------|
| Nb   | 40.8(6)  | 40.8(6)  | 40.8(6)  | 6.0(3)   | -6.0(3)  | 6.0(3)   |
| Ti   | 40.8(6)  | 40.8(6)  | 40.8(6)  | 6.0(3)   | -6.0(3)  | 6.0(3)   |
| O3   | 30.7(15) | 31(3)    | 30.7(15) | 0        | -2.8(18) | 0        |
| O2   | 37(2)    | 37(2)    | 37(2)    | 6(2)     | -6(2)    | -6(2)    |
| O1   | 199(16)  | 199(16)  | 199(16)  | 0        | 0        | 0        |
| Sr   | 199(16)  | 199(16)  | 199(16)  | 0        | 0        | 0        |

**Table S7.** Bond lengths.

| Atom | Atom            | Length/ $\text{\AA}$ | Atom | Atom              | Length/ $\text{\AA}$ |
|------|-----------------|----------------------|------|-------------------|----------------------|
| Nb01 | O3 <sup>1</sup> | 1.9811(16)           | Nb01 | O3 <sup>5</sup>   | 1.9811(16)           |
| Nb01 | O3 <sup>2</sup> | 1.9811(17)           | O3   | Nb01 <sup>6</sup> | 1.9811(16)           |
| Nb01 | O3 <sup>3</sup> | 1.9811(16)           | O3   | Sr1 <sup>7</sup>  | 3.304(5)             |
| Nb01 | O3 <sup>4</sup> | 1.9811(16)           | O2   | Sr1 <sup>7</sup>  | 2.2883(2)            |

**Table S8.** Bond angles.

| Atom            | Atom | Atom            | Angle/ $^\circ$ | Atom              | Atom | Atom              | Angle/ $^\circ$ |
|-----------------|------|-----------------|-----------------|-------------------|------|-------------------|-----------------|
| O3 <sup>1</sup> | Nb01 | O3              | 180.0           | O3 <sup>2</sup>   | Nb01 | O3 <sup>5</sup>   | 90.06(19)       |
| O3              | Nb01 | O3 <sup>2</sup> | 89.94(19)       | O3 <sup>4</sup>   | Nb01 | O3 <sup>5</sup>   | 89.94(19)       |
| O3              | Nb01 | O3 <sup>3</sup> | 89.94(19)       | O3 <sup>1</sup>   | Nb01 | O3 <sup>2</sup>   | 90.06(19)       |
| O3 <sup>2</sup> | Nb01 | O3 <sup>3</sup> | 89.94(19)       | O3 <sup>3</sup>   | Nb01 | O3 <sup>5</sup>   | 180.0           |
| O3              | Nb01 | O3 <sup>4</sup> | 90.06(19)       | Nb01              | O3   | Nb01 <sup>6</sup> | 141.1(3)        |
| O3 <sup>1</sup> | Nb01 | O3 <sup>3</sup> | 90.06(19)       | Nb01              | O3   | Ti01 <sup>6</sup> | 141.1           |
| O3 <sup>1</sup> | Nb01 | O3 <sup>4</sup> | 89.94(19)       | Nb01              | O3   | Sr1 <sup>7</sup>  | 109.43(13)      |
| O3 <sup>4</sup> | Nb01 | O3 <sup>3</sup> | 90.06(19)       | Nb01 <sup>6</sup> | O3   | Sr1 <sup>7</sup>  | 109.43(13)      |
| O3              | Nb01 | O3 <sup>5</sup> | 90.06(19)       | Ti01 <sup>6</sup> | O3   | Nb01 <sup>6</sup> | 0.0             |
| O3 <sup>4</sup> | Nb01 | O3 <sup>2</sup> | 180.0           | Ti01 <sup>6</sup> | O3   | Sr1 <sup>7</sup>  | 109.43(13)      |
| O3 <sup>1</sup> | Nb01 | O3 <sup>5</sup> | 89.94(19)       |                   |      |                   |                 |

## 5) Fit of the hydropyrochlore EXAFS data considering one oxygen shell only

### shell only

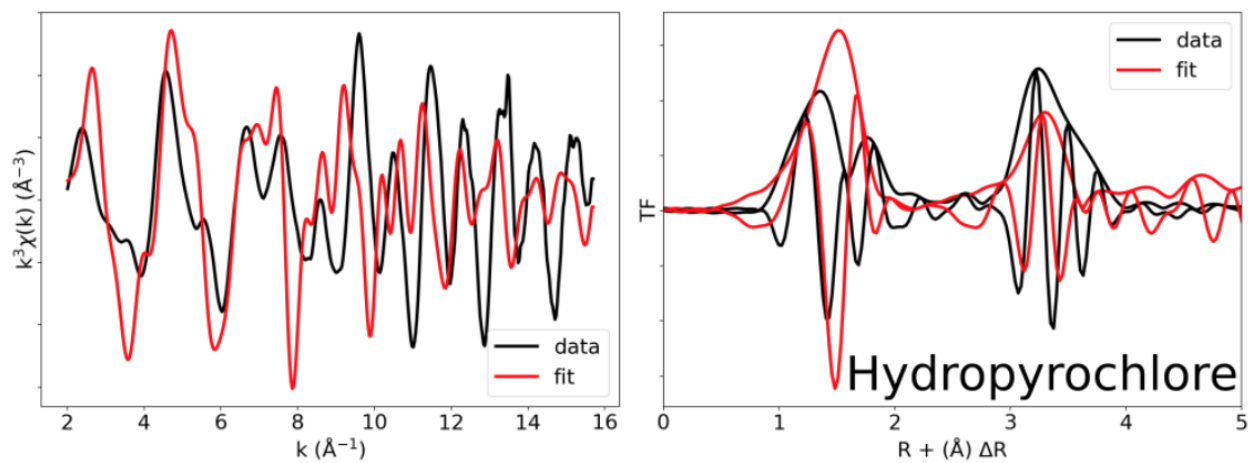

**Figure S2.** Discrepancy between the fit and the experimental EXAFS and FFT spectra of hydropyrochlore considering a single oxygen shell as determined by XRD refinement.
